# Supplementary material
Source: Springer Nature journal article supplement (https://www.springermedizin.de/resource/supplementary/12876_2013_1091_MOESM3_ESM.pdf/9438422)
Supplement: MOESM3 [file 9438422]

**Table 3: Correlation with pepsinogen 1:2 ratio**

|                   | Spearman's $\rho$ | <i>P</i> value |
|-------------------|-------------------|----------------|
| <b>pH (n=121)</b> | -0.345            | 0.0001         |
| <b>BMI</b>        | -0.003            | 0.967          |
| <b>MUAC</b>       | 0.005             | 0.947          |
| <b>Body fat</b>   | -0.107            | 0.122          |
| <b>Lean mass</b>  | 0.075             | 0.280          |
| <b>Impedance</b>  | -0.043            | 0.542          |
